# Supplementary material for: Root hydraulic properties: An exploration of their variability across scales
Source: PubMed Central journal article supplement — Plant Direct. 2024 Apr 7;8(4):e582. doi: 10.1002/pld3.582 (PMC10999368; doi:10.1002/pld3.582), 2024-04-07
Supplement: PLD3-8-e582-s001.pdf [file PLD3-8-e582-s001.pdf]

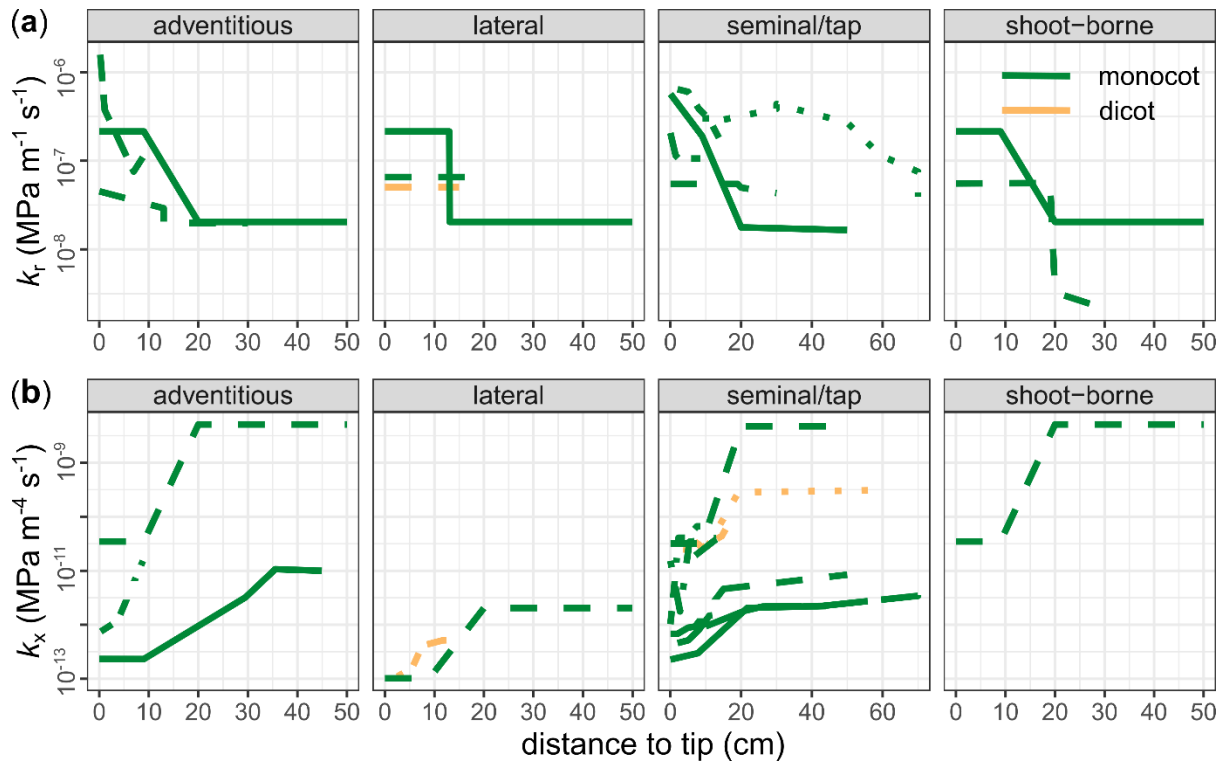

**Figure S1: Spatial gradients in root hydraulic properties.** Spatial variation in radial conductivity ( $k_r$ ) (a) and axial conductance ( $k_x$ ) (b) alongside roots (from tip to base), for different root types in monocot (green) and dicot (yellow) herbaceous species. The data corresponds to published studies on segment-scale root hydraulic properties (Ahmed *et al.* 2018; Bramley *et al.* 2007; Bramley *et al.* 2009; Doussan *et al.* 1998; Doussan *et al.* 2006; Frensch & Steudle, 1989; Huang & Steudle, 1992; Knipfer & Fricke, 2011; Meunier *et al.* 2018; Nobel *et al.* 1993; Ranathunge *et al.* 2017). The different line types indicate different references.

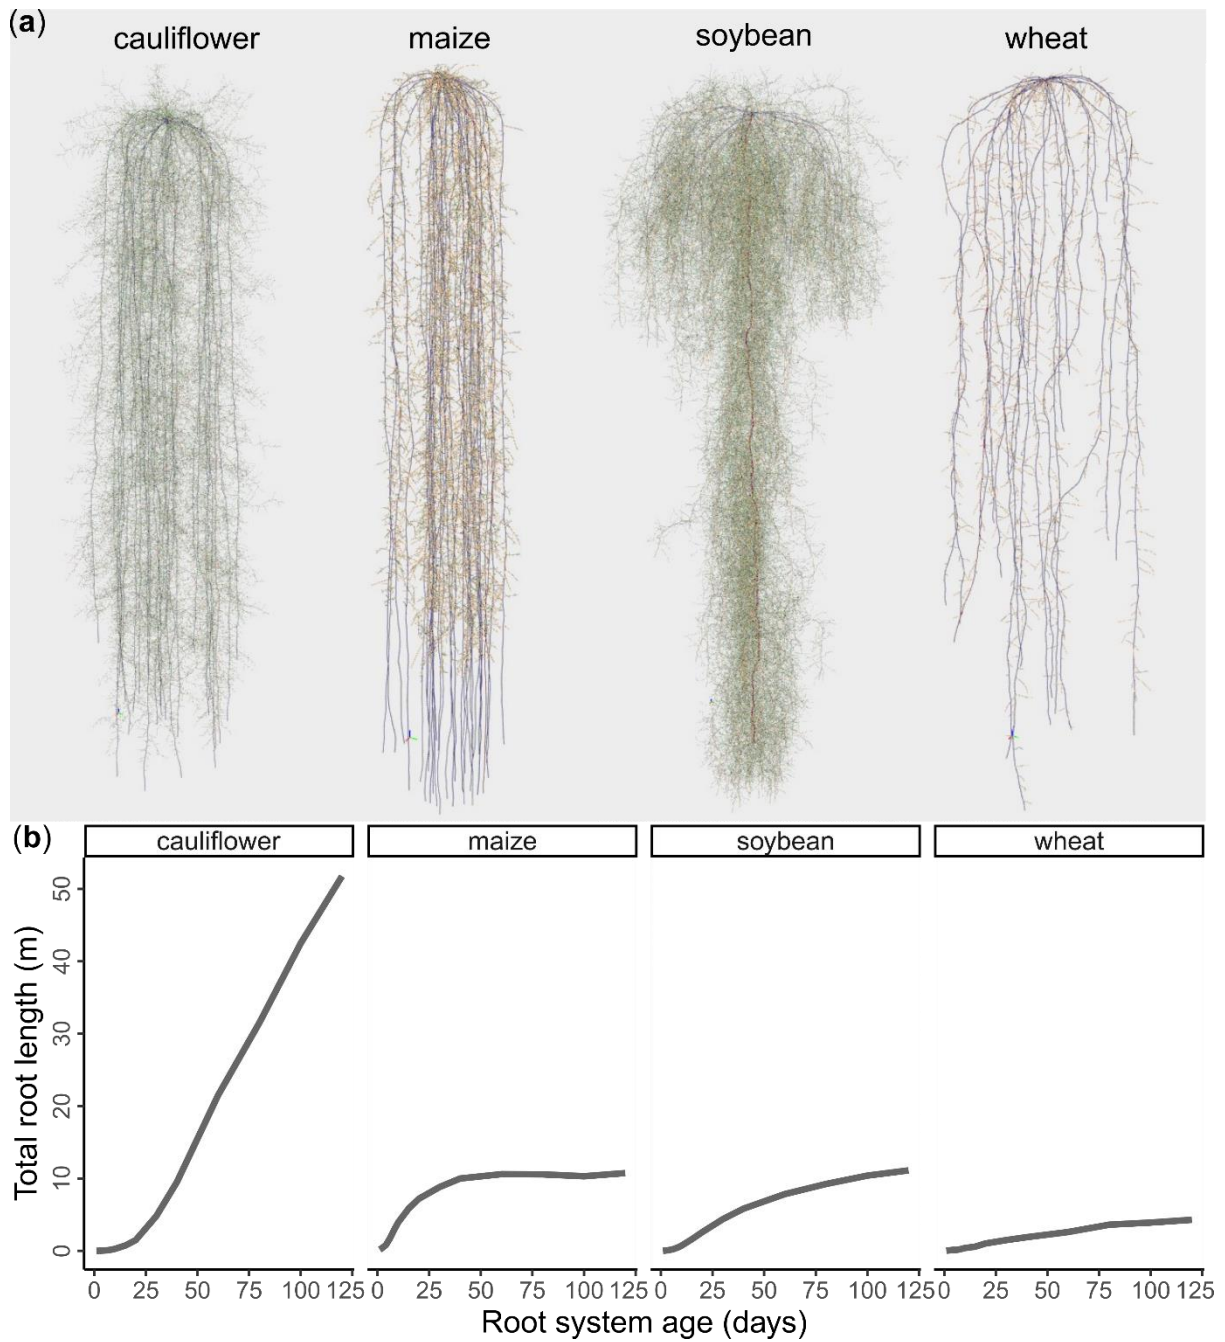

**Figure S2: Root architecture and root size of different crops.** Root architecture at day 120 (a) and total root length development during a 120-day period (b) for four different crop species: cauliflower (dicot herbaceous crop), maize (C<sub>4</sub> grass), soybean (legume crop) and wheat (C<sub>3</sub> grass). Root architecture development was simulated with CPlantBox (Schepf *et al.* 2018), based on available XML-files from the literature (Leitner *et al.* 2010; Moraes *et al.* 2021; Morandage *et al.* 2021; Vansteenkiste *et al.* 2014).

## References

- Ahmed MA, Zarebanadkouki M, Meunier F, Javaux M, Kaestner A, Carminati A. 2018.** Root type matters: measurement of water uptake by seminal, crown, and lateral roots in maize. *Journal of Experimental Botany* **69**: 1199–1206.
- Bramley H, Turner NC, Turner DW, Tyerman SD. 2007.** Comparison between gradient-dependent hydraulic conductivities of roots using the root pressure probe: the role of pressure propagations and implications for the relative roles of parallel radial pathways. *Plant, Cell & Environment* **30**: 861–874.
- Bramley H, Turner NC, Turner DW, Tyerman SD. 2009.** Roles of morphology, anatomy, and aquaporins in determining contrasting hydraulic behavior of roots. *Plant Physiology* **150**: 348–364.
- Doussan C, Pierret A, Garrigues E, Pagès L. 2006.** Water uptake by plant roots: II – Modelling of water transfer in the soil root-system with explicit account of flow within the root system – comparison with experiments. *Plant and Soil* **283**: 99–117.
- Doussan C, Vercambre G, Pagè L. 1998.** Modelling of the hydraulic architecture of root systems: an integrated approach to water absorption distribution of axial and radial conductances in maize. *Annals of Botany* **81**: 225–232.
- Frensch J, Steudle E. 1989.** Axial and radial hydraulic resistance to roots of maize (*Zea mays* L.). *Plant Physiology* **91**: 719–726.
- Huang B, Nobel PS. 1992.** Hydraulic conductivity and anatomy for lateral roots of *Agave deserti* during root growth and drought-induced abscission. *Journal of Experimental Botany* **43**: 1441–1449.
- Knipfer T, Fricke W. 2011.** Water uptake by seminal and adventitious roots in relation to whole-plant water flow in barley (*Hordeum vulgare* L.). *Journal of Experimental Botany* **62**: 717–733.
- Meunier F, Zarebanadkouki M, Ahmed MA, Carminati A, Couvreur V, Javaux M. 2018.** Hydraulic conductivity of soil-grown lupine and maize unbranched roots and maize root-shoot junctions. *Journal of Plant Physiology* **227**: 31–44.
- Moraes MT de, Debiasi H, Franchini JC, Mastroberti AA, Levien R, Leitner D, Schnepf A. 2020.** Soil compaction impacts soybean root growth in an Oxisol from subtropical Brazil. *Soil and Tillage Research* **200**: 104611.
- Morandage S, Vanderborght J, Zörner M, Cai G, Leitner D, Vereecken H, Schnepf A. 2021.** Root architecture development in stony soils. *Vadose Zone Journal* **20**: e20133.
- Nobel PS, Huang B, Garcia-Moya E. 1993.** Root distribution, growth, respiration, and hydraulic conductivity for two highly productive agaves. *Journal of Experimental Botany* **44**: 747–754.

**Ranathunge K, Kim YX, Wassmann F, Kreszies T, Zeisler V, Schreiber L. 2017.** The composite water and solute transport of barley (*hordeum vulgare*) roots: Effect of suberized barriers. *Annals of Botany* **119**: 629–643.

**Schnepf A, Leitner D, Landl M, Lobet G, Mai TH, Morandage S, Sheng C, Zörner M, Vanderborght J, Vereecken H. 2018.** CRootBox: a structural functional modelling framework for root systems. *Annals of Botany* **121**: 1033–1053.

**Vansteenkiste J, Van Loon J, Garré S, Pagès L, Schrevens E, Diels J. 2014.** Estimating the parameters of a 3-D root distribution function from root observations with the trench profile method: case study with simulated and field-observed root data. *Plant and Soil* **375**: 75–88.
